# Supplementary material for: Effects of Crystal Defects on the Electronic and Magnetic Properties of Bulk and 2D Monolayer MoS2: A Density Functional Theoretical study
Source: Research Square preprint supplement (doi:10.21203/rs.3.rs-6331324/v1), 2025-04-23
Supplement: Supplementary file 1 [file 5d1f098ecbc093776c3ef0de.docx]

**Effects of Crystal Defects on the Electronic and Magnetic properties of Bulk and 2D monolayer MoS2: A Density Functional Theoretical study**

aOlha Shyiko, aVenkateswara Rao Penugonda, bPeter Nattaniel Nelson*

aDepartment of Physics, The University of the West Indies Mona, Kingston 7, St. Andrew, Jamaica

bDepartment of Chemistry, The University of the West Indies Mona, Kingston 7, St. Andrew, Jamaica

**Supporting Information**

# **Table S1.** Formulae for calculating defect formation energies.

| Type of defect | Formation energy formula |
| --- | --- |
| Mo-rich |  |
| S-rich |  |
| Mo-rich |  |
| S-rich |  |
| Mo-rich |  |
| S-rich |  |
| Mo-rich |  |
| S-rich |  |
| Mo-rich |  |
| S-rich |  |
| Mo-rich |  |
| S-rich |  |

Where and are chemical potentials of isolated Mo and S respectively. To calculate these chemical potentials, consideration was given to stable cubic structure of Mo with 2 atoms, and stable structure of S, which consists of 16 S clusters each having 8 atoms of S. For Mo-rich case, , . For S-rich case and . The energy needed to form monolayer , ,is calculated as:

Where is the total energy of unit cell monolayer obtained from SCF calculations, and are the total energies of unit cell and S respectively obtained from SCF calculations.

# **Table S2.** Calculated defect formation energies.

| Type of defect | Charge state | Formation energy of defect with correction term included for Mo-rich condition, eV |  | Formation energy of defect with correction term included for S-rich condition, eV | Correction term, eV |
| --- | --- | --- | --- | --- | --- |
| Vacancy S | -1 | 2.67 |  | 4.30 | -1.15 |
| 0 | 1.32 |  | 2.95 | 0.00 |
| 1 | 4.03 |  | 5.66 | -1.19 |
| 2 | 10.87 |  | 12.50 | -4.79 |
| Vacancy Mo | -3 | 4.55 |  | 1.29 | -10.70 |
| -2 | 7.53 |  | 4.27 | -4.99 |
| -1 | 8.68 |  | 5.42 | -1.15 |
| 0 | 7.89 |  | 4.63 | 0.00 |
| 1 | 10.70 |  | 7.44 | -0.91 |
| Mo in S | 0 | 3.96 |  | 8.85 | 0.00 |
| 1 | 5.59 |  | 10.48 | -1.08 |
| 2 | 11.61 |  | 16.50 | -4.47 |
| 3 | 22.24 |  | 27.12 | -10.17 |
| S in Mo | -2 | 9.49 |  | 4.61 | -4.67 |
| -1 | 10.07 |  | 5.18 | -1.23 |
| 0 | 9.04 |  | 4.15 | 0.00 |
| 1 | 11.71 |  | 6.83 | -0.92 |
| 2 | 18.78 |  | 13.90 | -4.03 |
| Mo interstitial | -2 | 4.63 |  | 7.89 | -4.63 |
|  | -1 | 4.91 |  | 8.16 | -1.17 |
|  | 0 | 3.31 |  | 6.57 | 0.00 |
|  | 1 | 5.45 |  | 8.71 | -1.11 |
|  | 2 | 8.81 |  | 12.06 | -7.41 |
|  | 3 | 17.70 |  | 20.96 | -14.69 |
| S interstitial | -2 | 5.16 |  | 3.53 | -4.31 |
|  | -1 | 5.45 |  | 3.82 | -1.06 |
|  | 0 | 4.32 |  | 2.69 | 0.00 |
|  | 1 | 6.41 |  | 4.78 | -1.17 |
|  | 2 | 12.51 |  | 10.88 | -4.55 |
| V in Mo | -2 | 0.35 |  | -2.90 | -4.49 |
|  | -1 | 1.05 |  | -2.21 | -1.14 |
|  | 0 | 0.42 |  | -2.83 | 0.00 |
|  | 1 | 3.30 |  | 0.04 | -1.10 |
|  | 2 | 10.41 |  | 7.16 | -4.45 |
|  | 3 | 21.87 |  | 18.62 | -10.03 |
| V in S | -1 | 4.13 |  | 5.76 | -1.20 |

**Table S2 Continued**

| Type of defect | Charge state | Formation energy of defect with correction term included for Mo-rich condition, eV | Formation energy of defect with correction term included for S-rich condition, eV | Correction term, eV |
| --- | --- | --- | --- | --- |
|  | 0 | 2.63 | 4.26 | 0.00 |
|  | 1 | 4.21 | 5.84 | -1.12 |
|  | 2 | 10.75 | 12.38 | -4.57 |
|  | 3 | 21.45 | 23.08 | -10.34 |
| V interstitial 1 | -2 | 3.47 | 3.47 | -4.41 |
|  | -1 | 3.92 | 3.92 | -1.08 |
|  | 0 | 2.78 | 2.78 | 0.00 |
|  | 1 | 4.98 | 4.98 | -1.16 |
|  | 2 | 11.38 | 11.38 | -4.57 |
|  | 3 | 22.05 | 22.05 | -10.22 |
| V interstitial 2 | -2 | 4.42 | 4.43 | -4.76 |
|  | -1 | 4.77 | 4.77 | -1.22 |
|  | 0 | 3.37 | 3.37 | 0.00 |
|  | 1 | 4.77 | 4.77 | -1.08 |
|  | 2 | 10.39 | 10.39 | -4.47 |
|  | 3 | 20.14 | 20.14 | -10.17 |
|  | 0 | 2.63 | 4.26 | 0.00 |

# **S3**


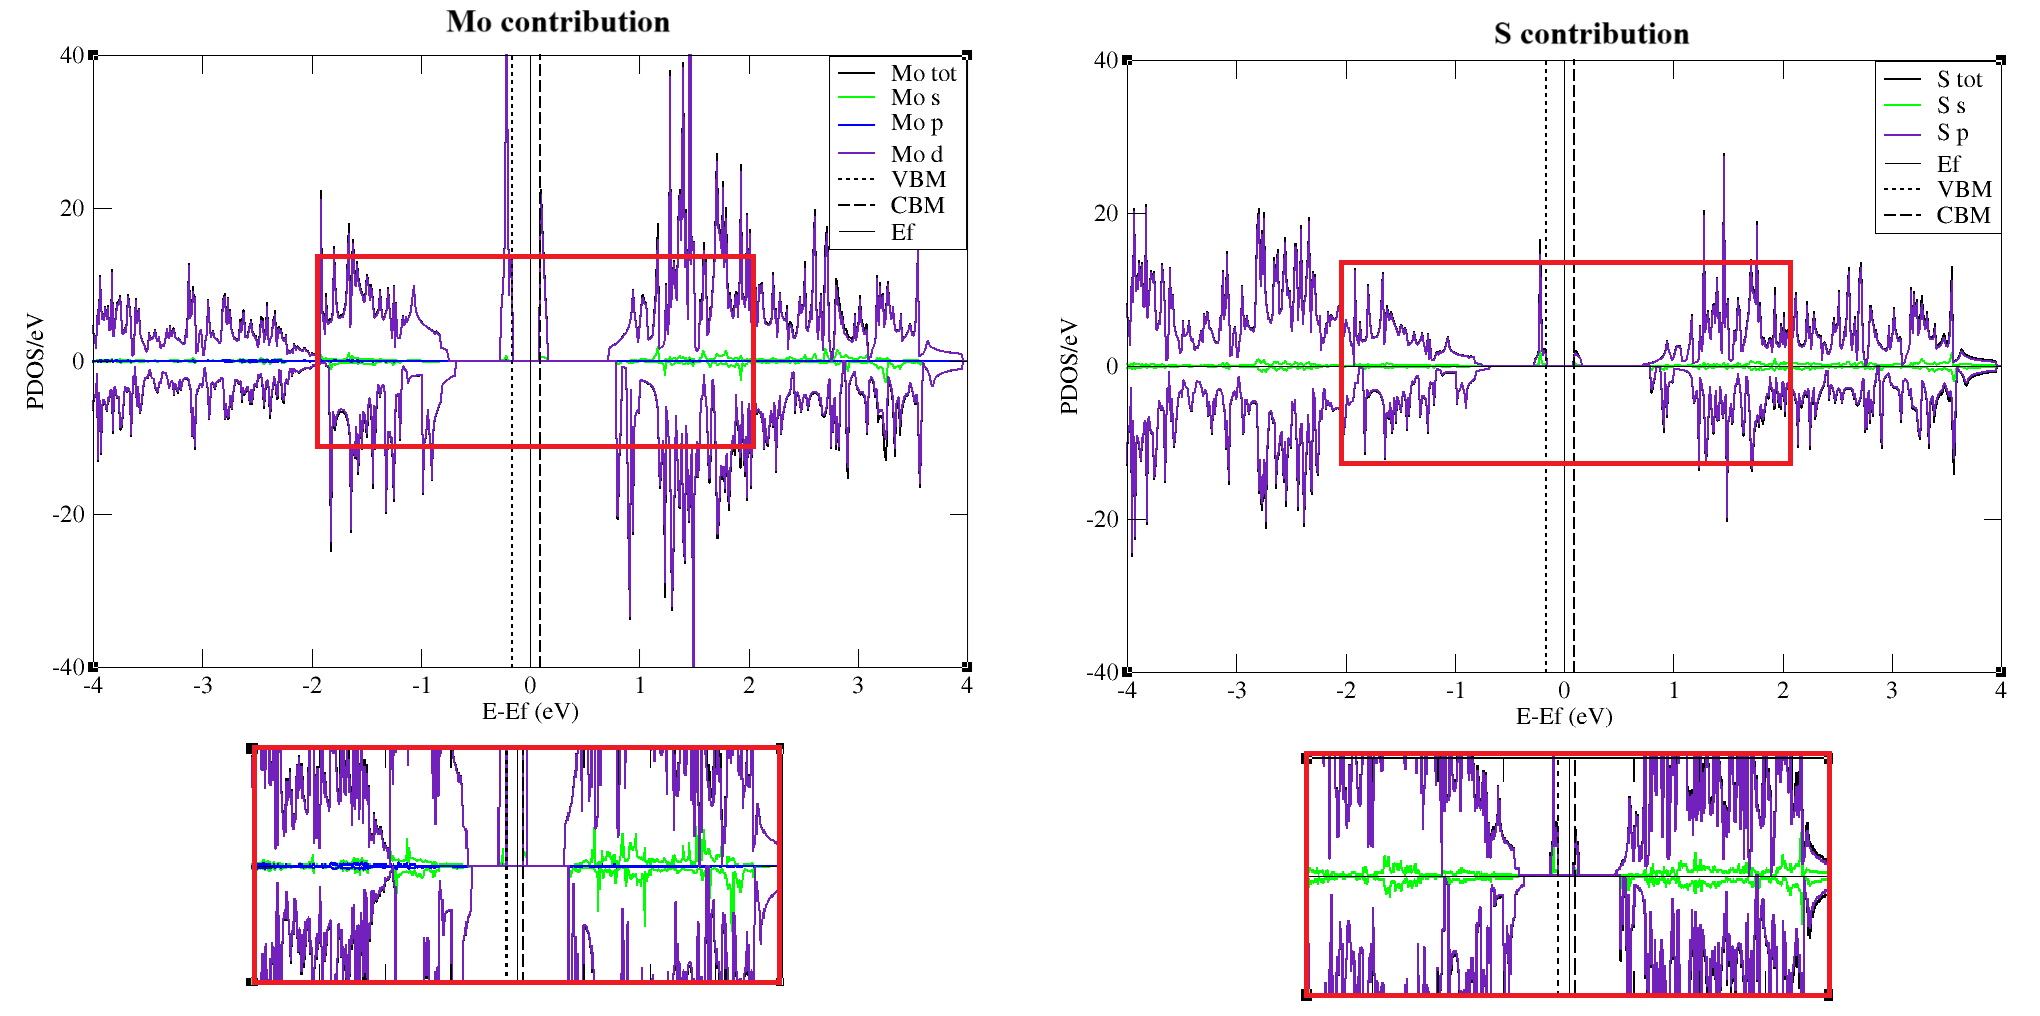


PDOS of substitutional defect Mo in position of S with the contribution of Mo and S atomic orbitals.

# **S4**


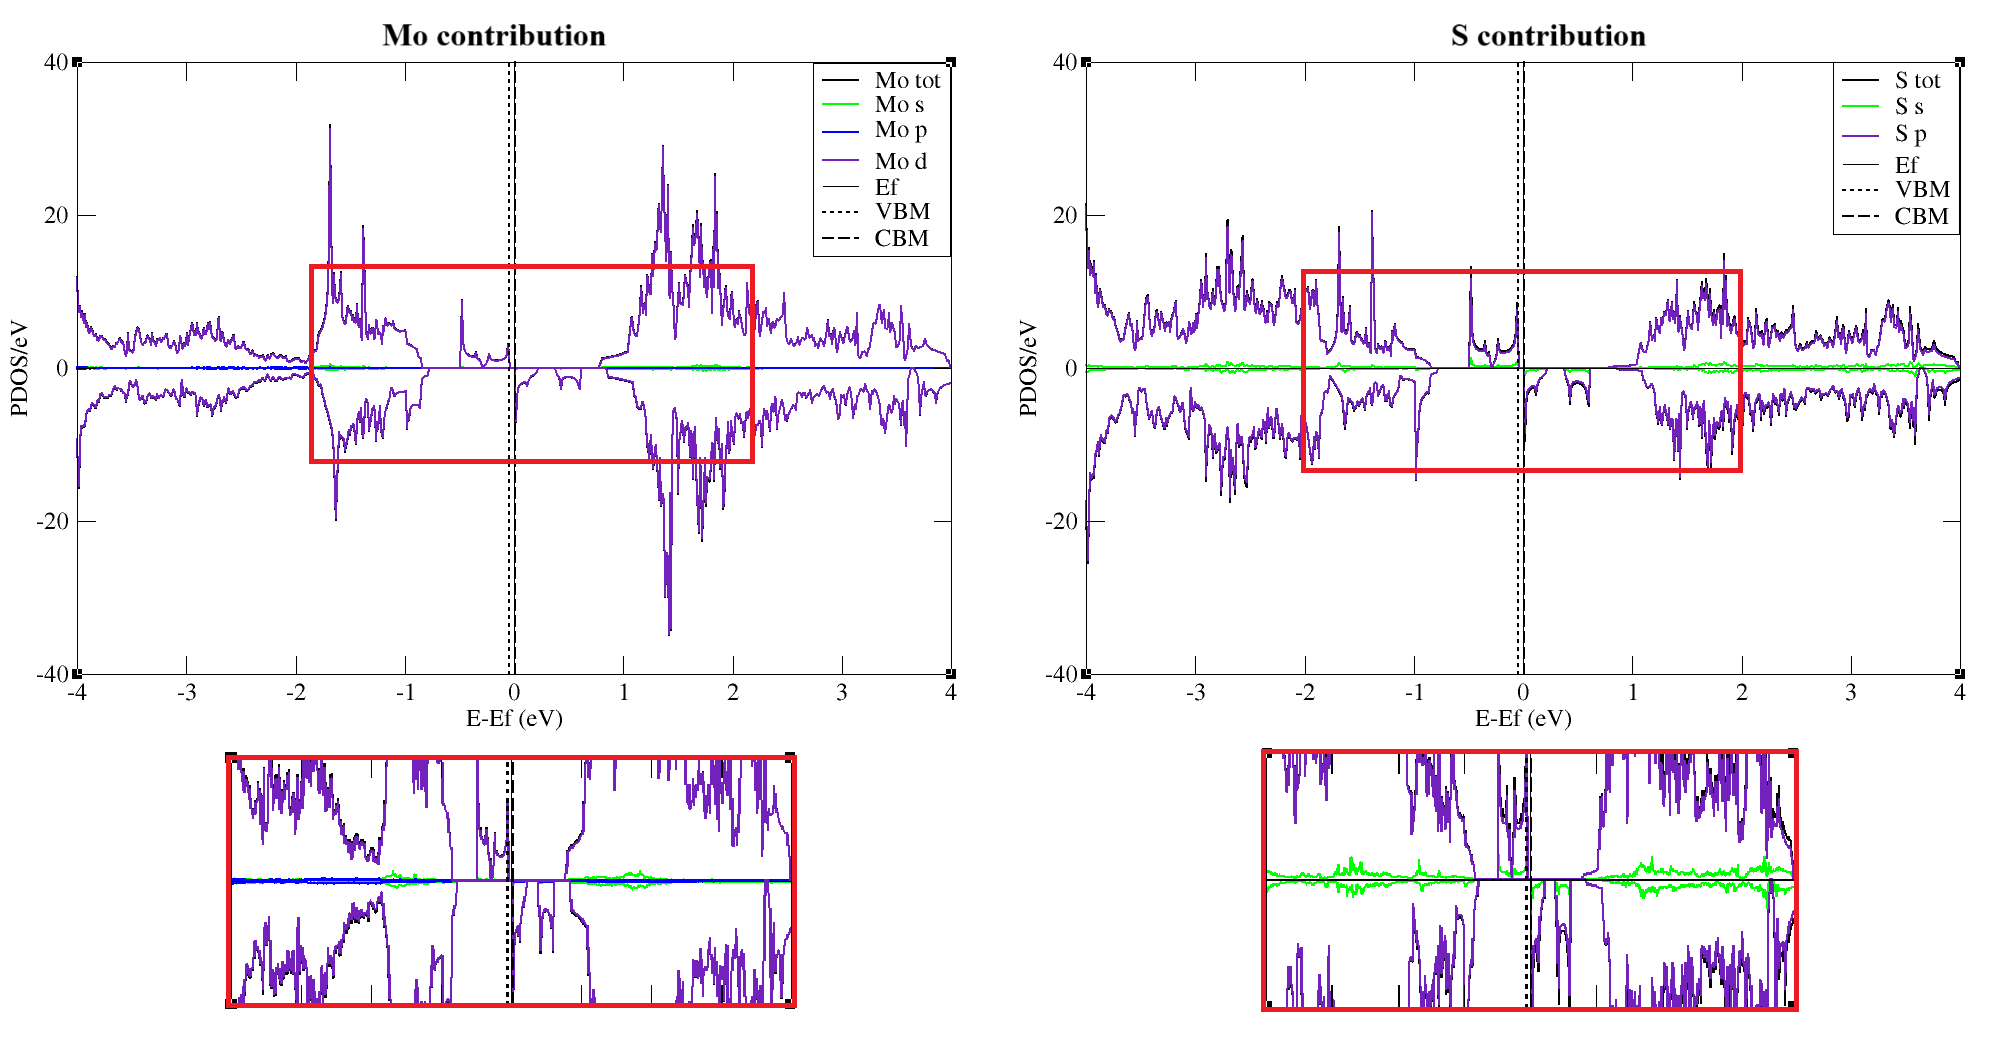


PDOS of S interstitial defect with the contribution of Mo and S atomic orbitals.

# **S5**


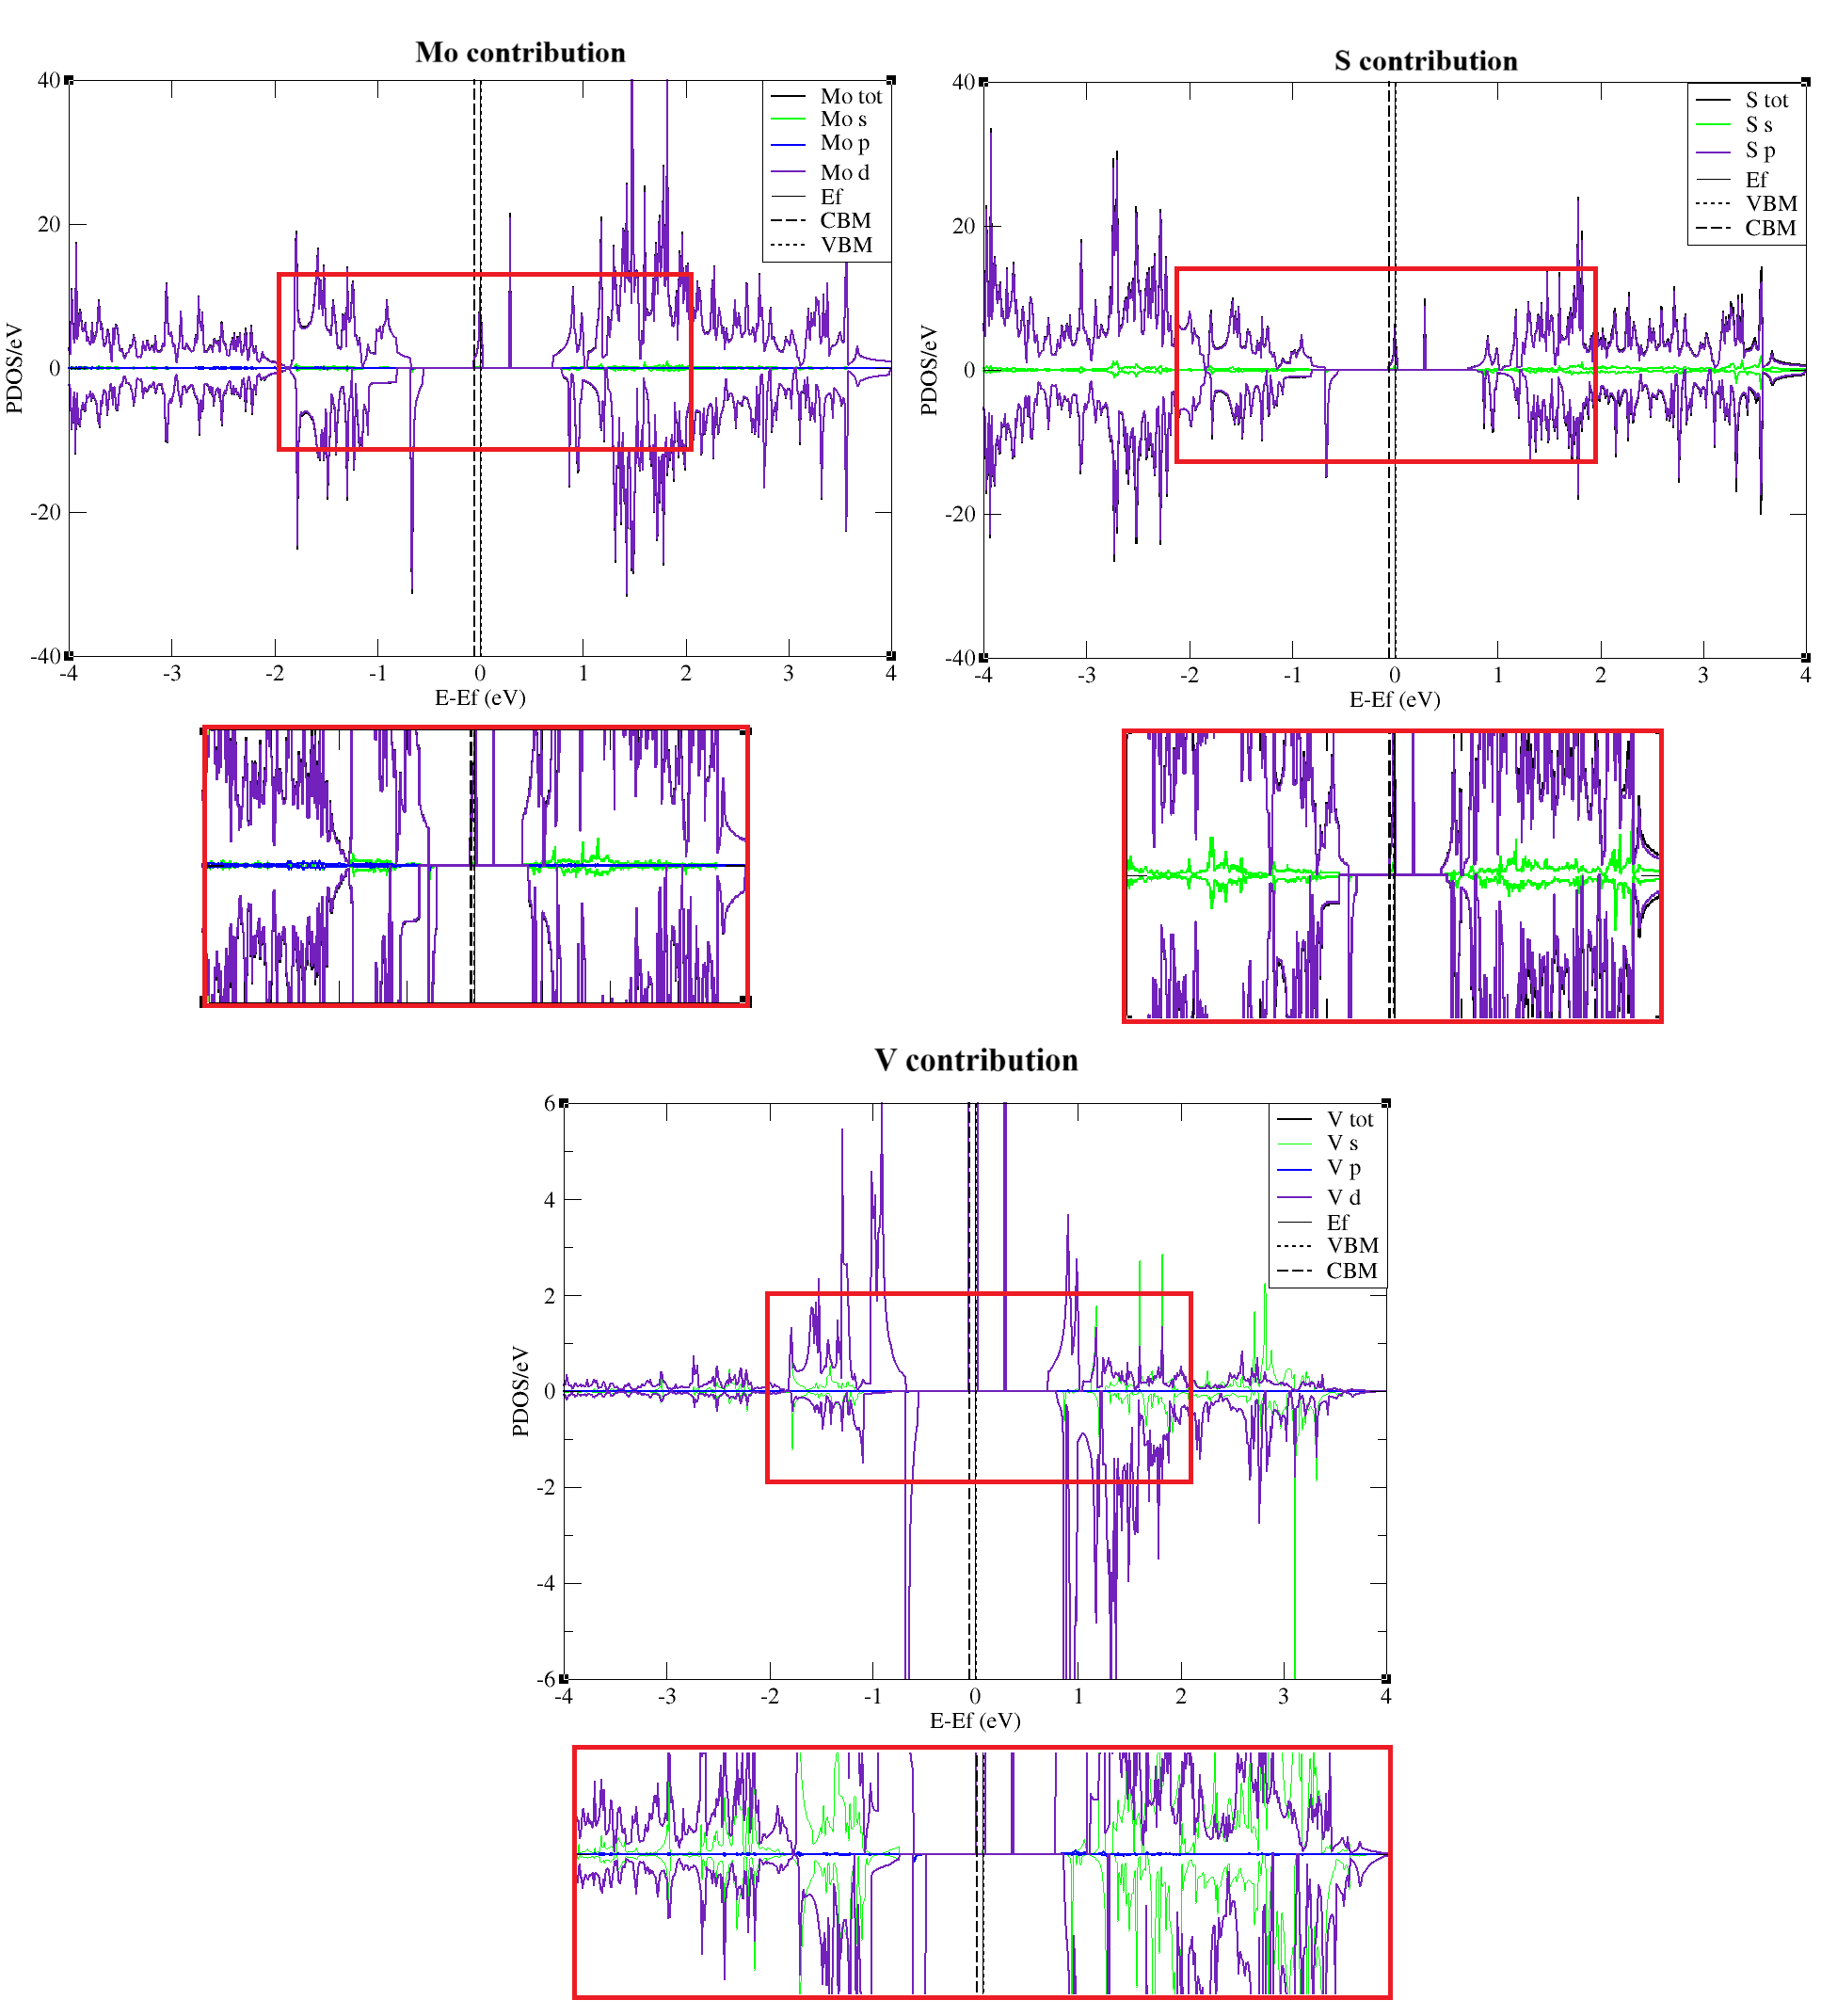


PDOS of substitutional defect V in position of S with the contribution from Mo, S and V atomic orbitals.

# **S6**


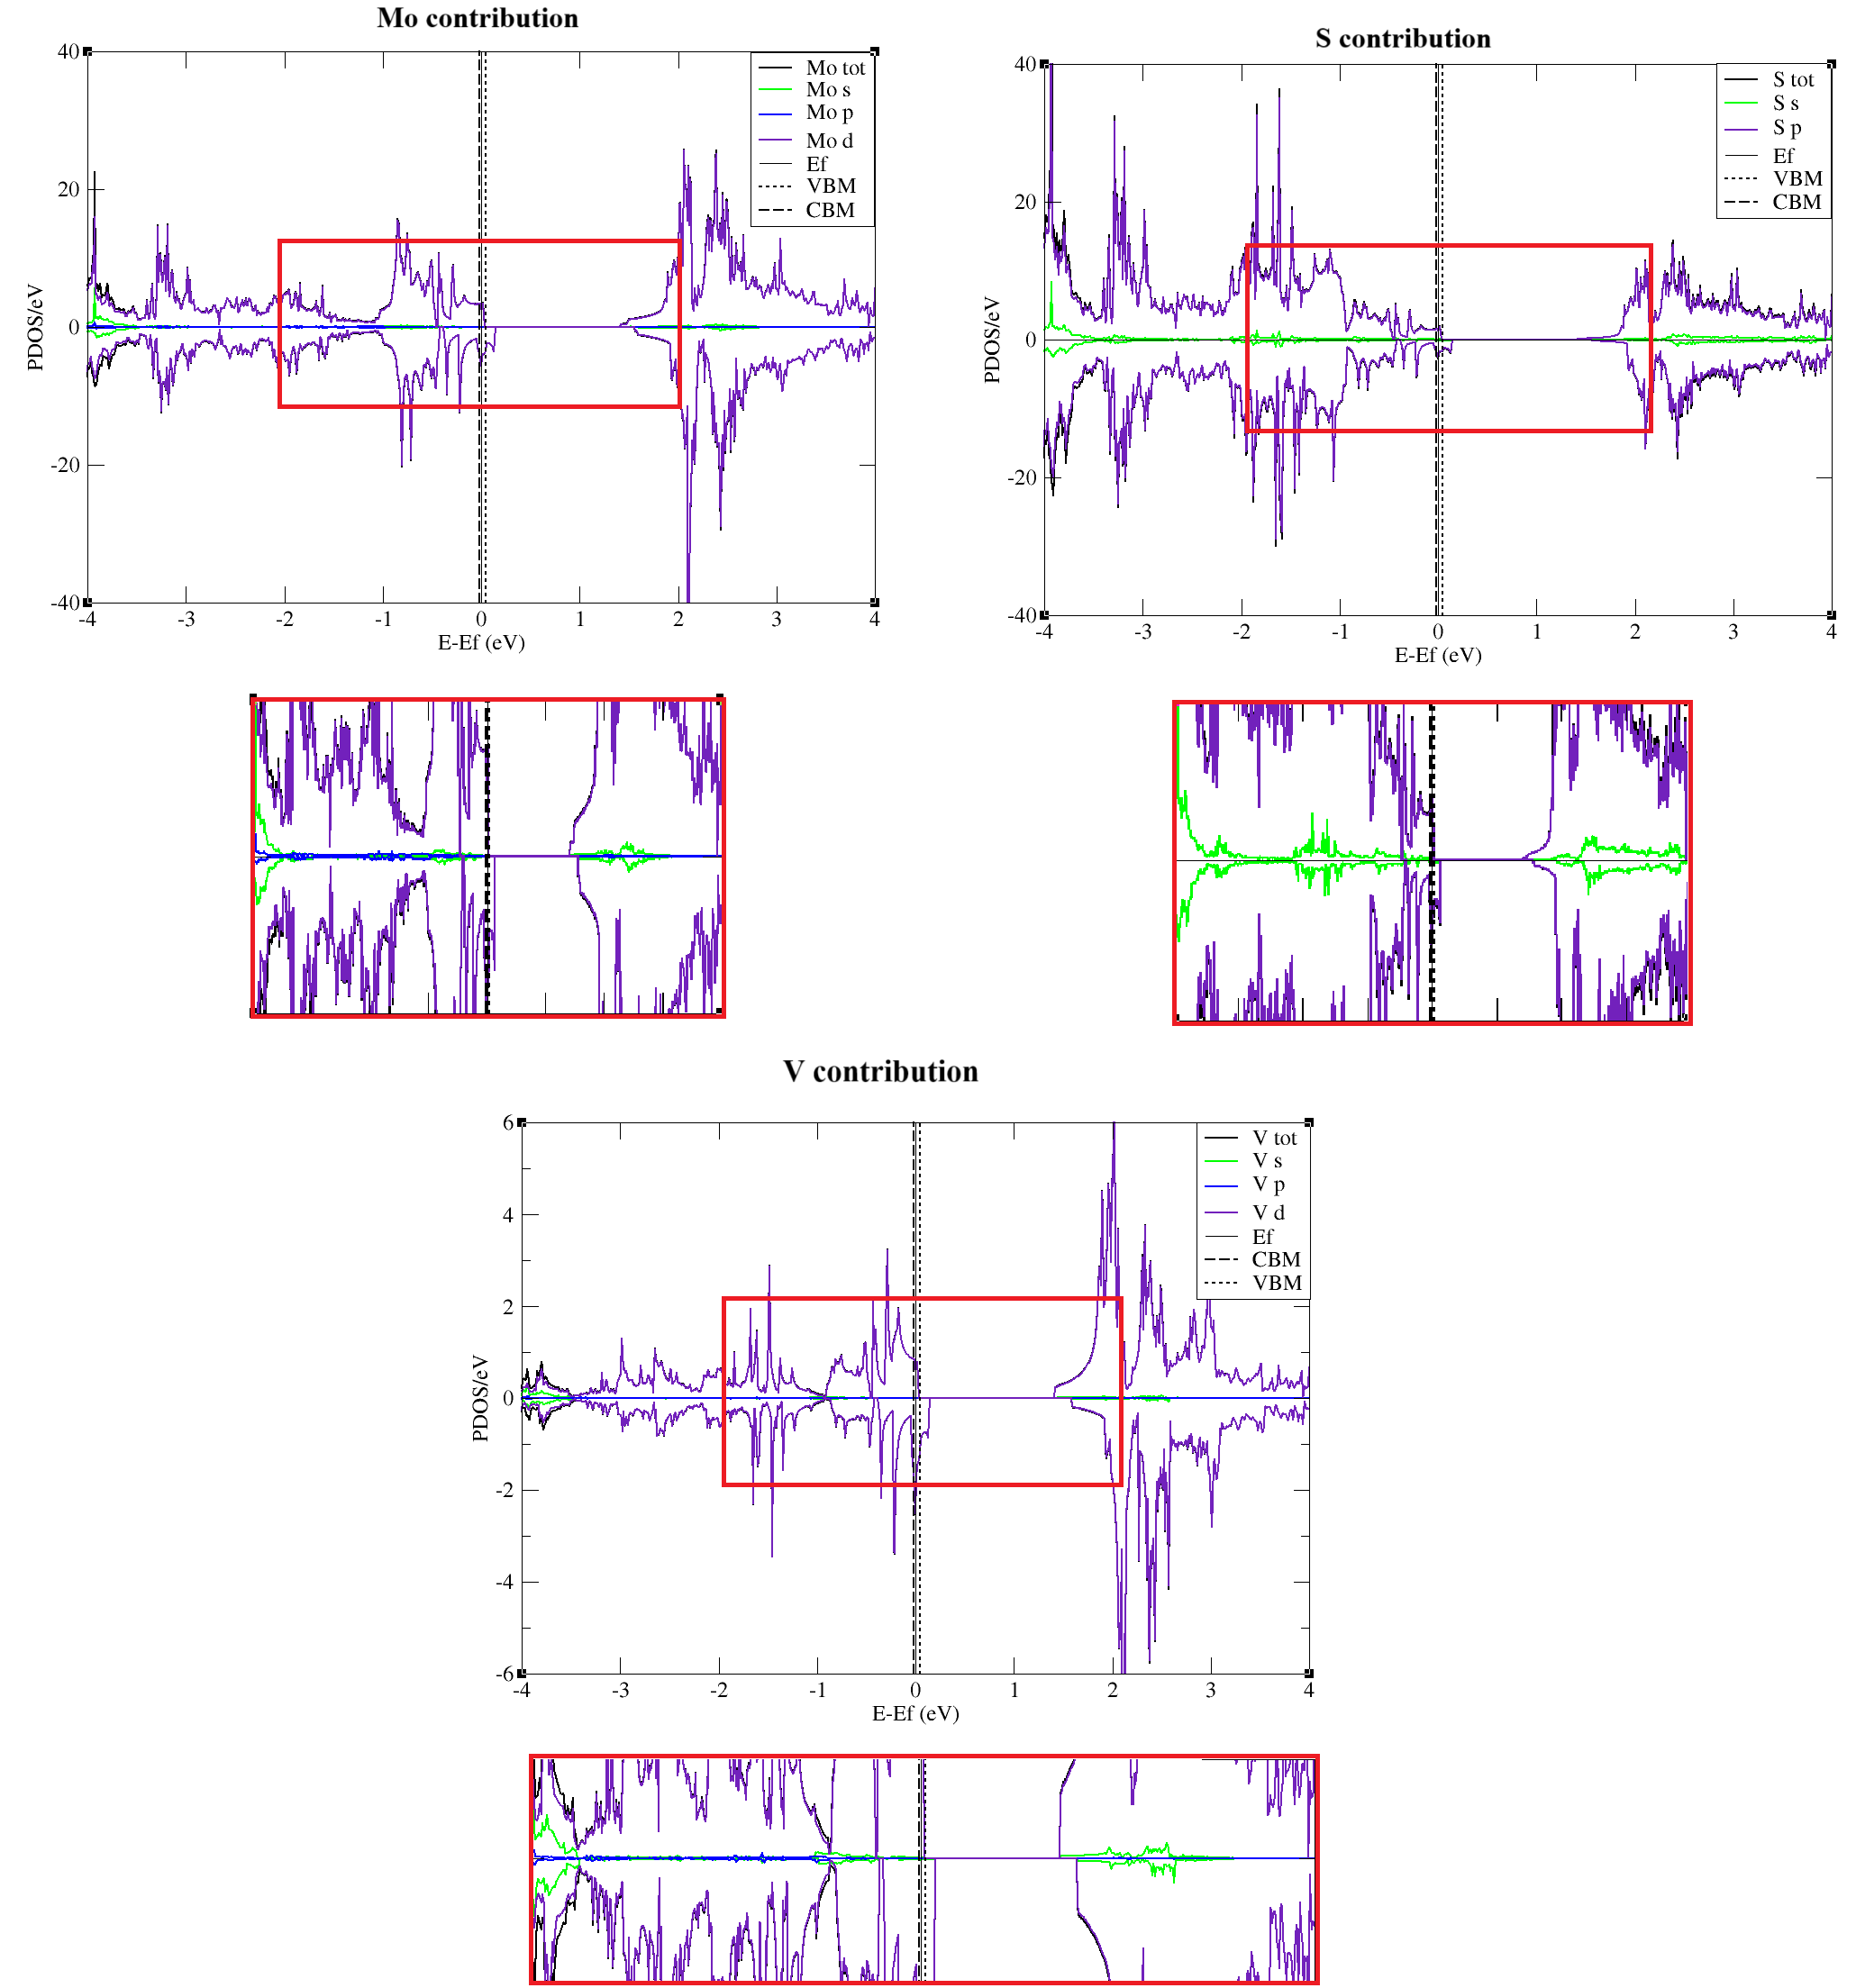


PDOS of substitutional defect V in position of Mo with the contribution from Mo, S and V atomic orbitals.

# **S7**


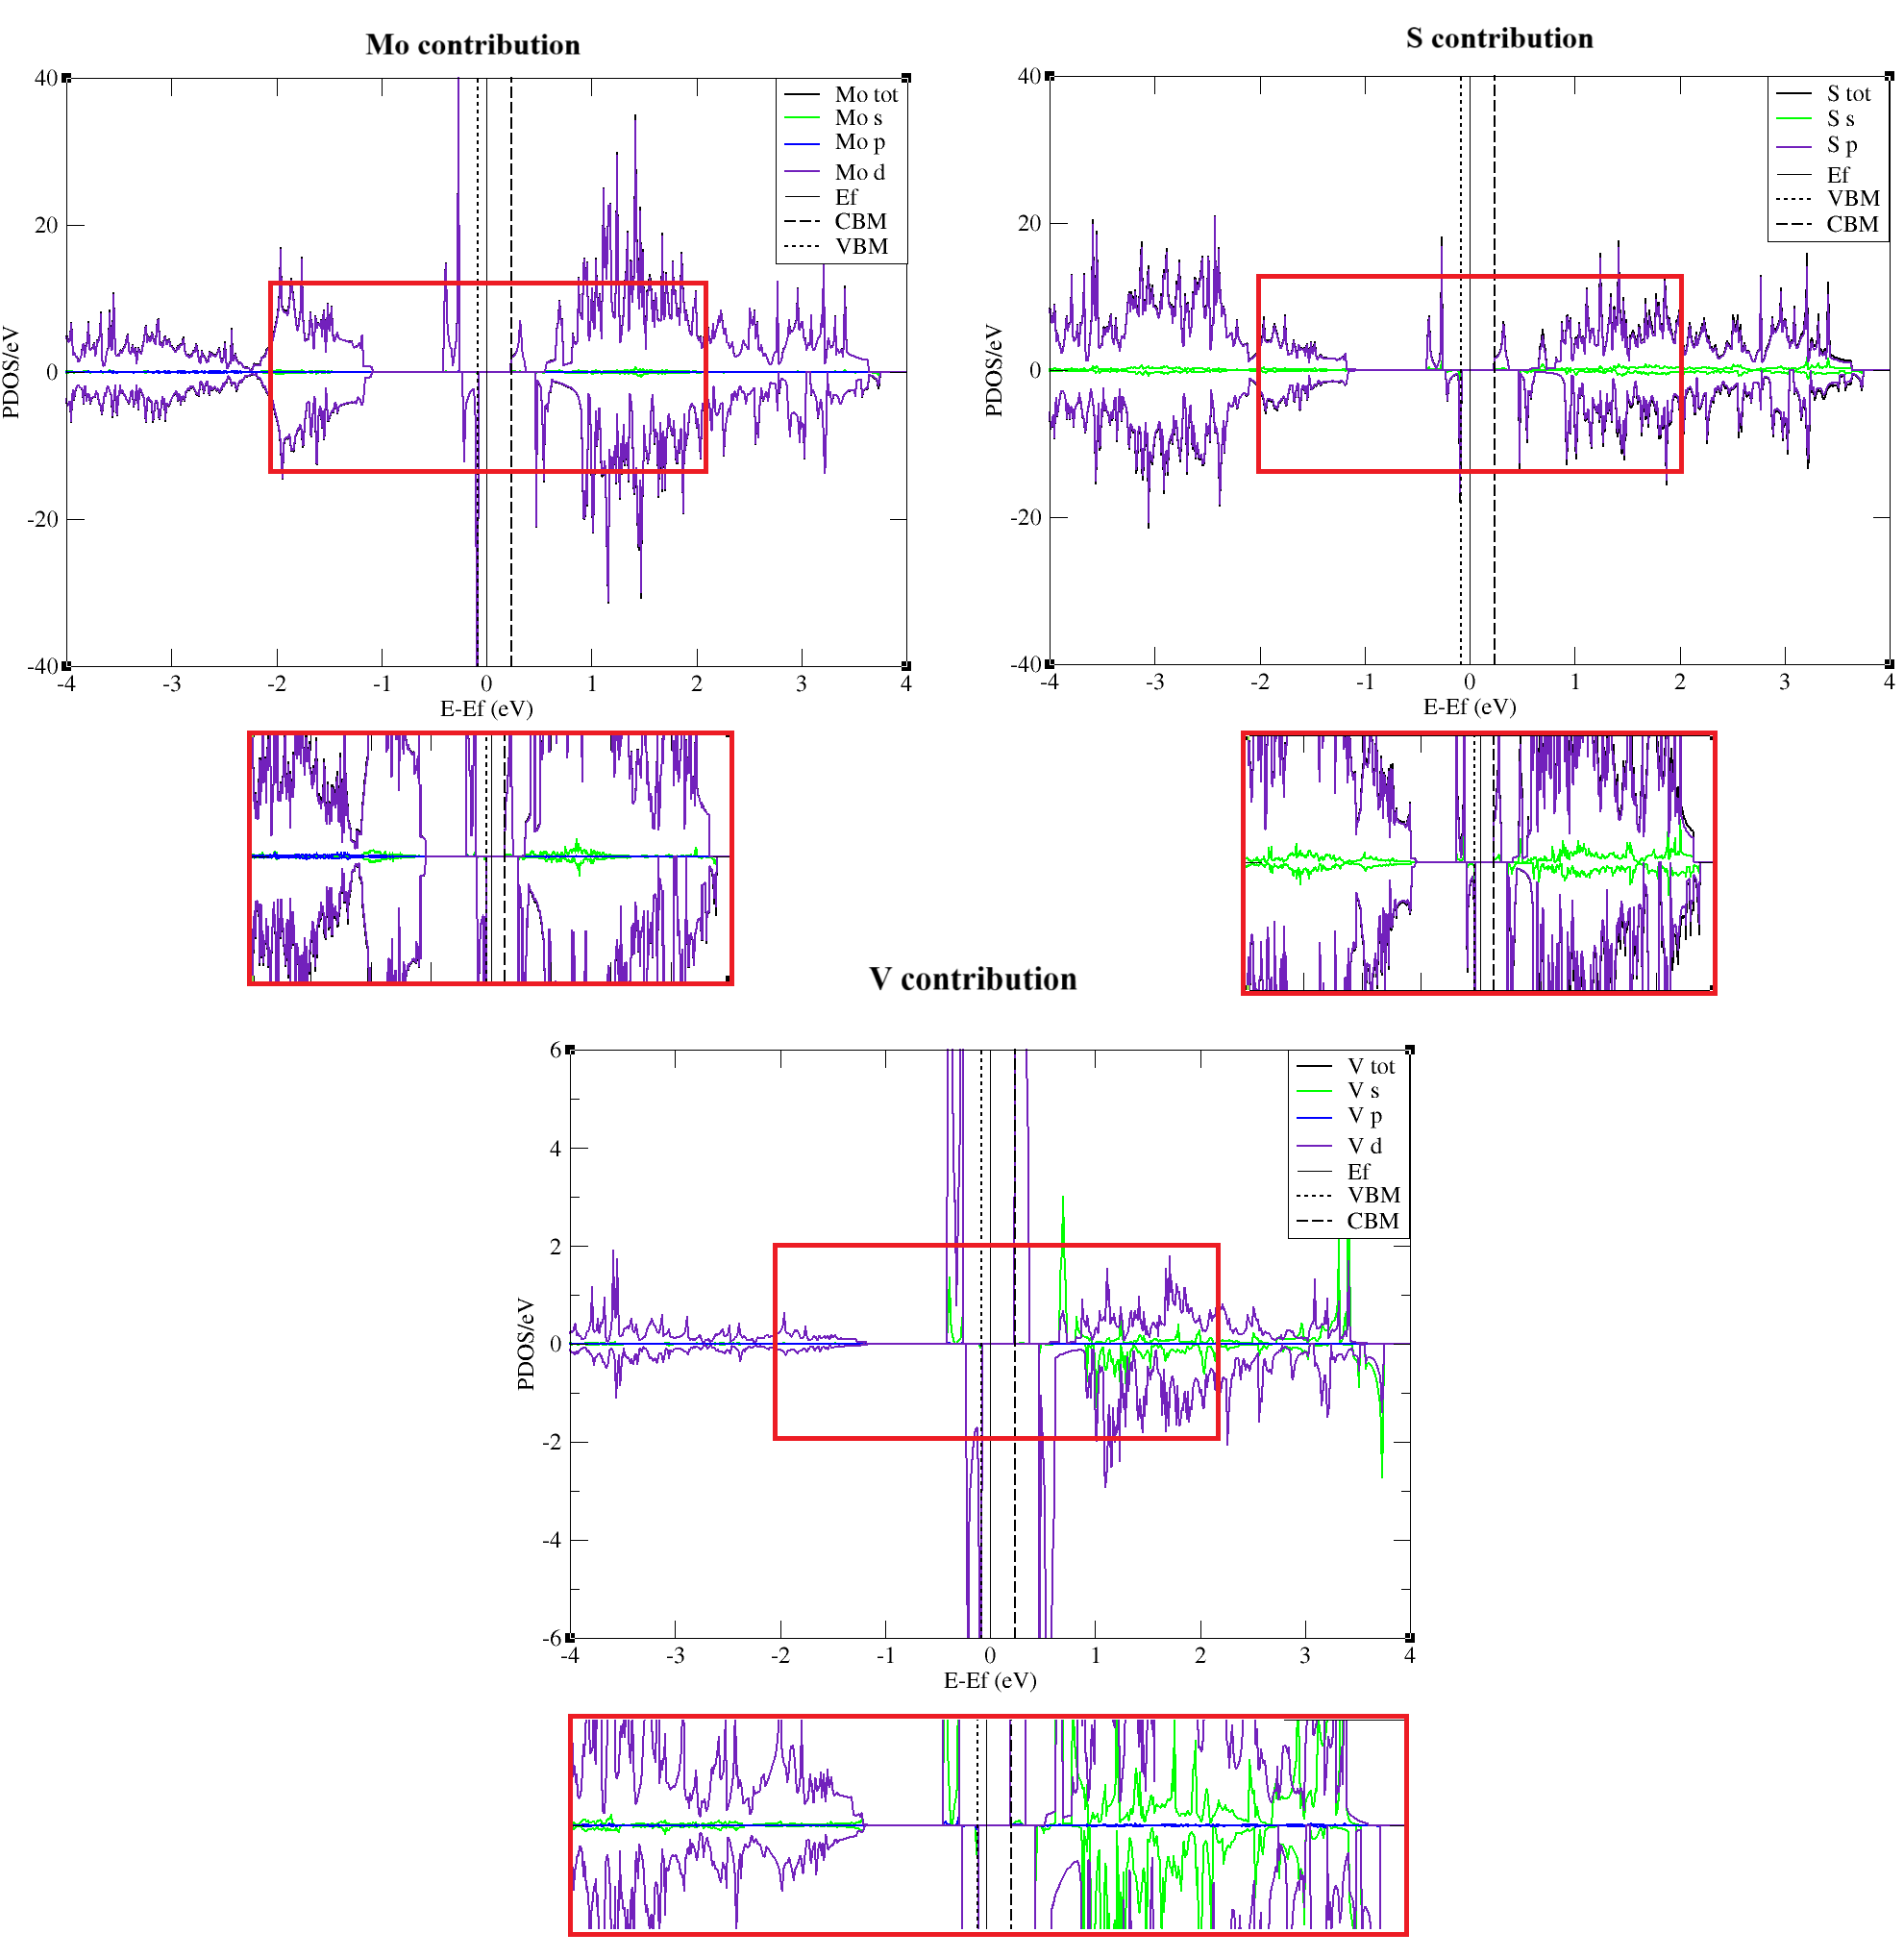


PDOS of V interstitial defect in atomic position #2 with the contribution from Mo, S and V atomic orbitals.

# **S8**


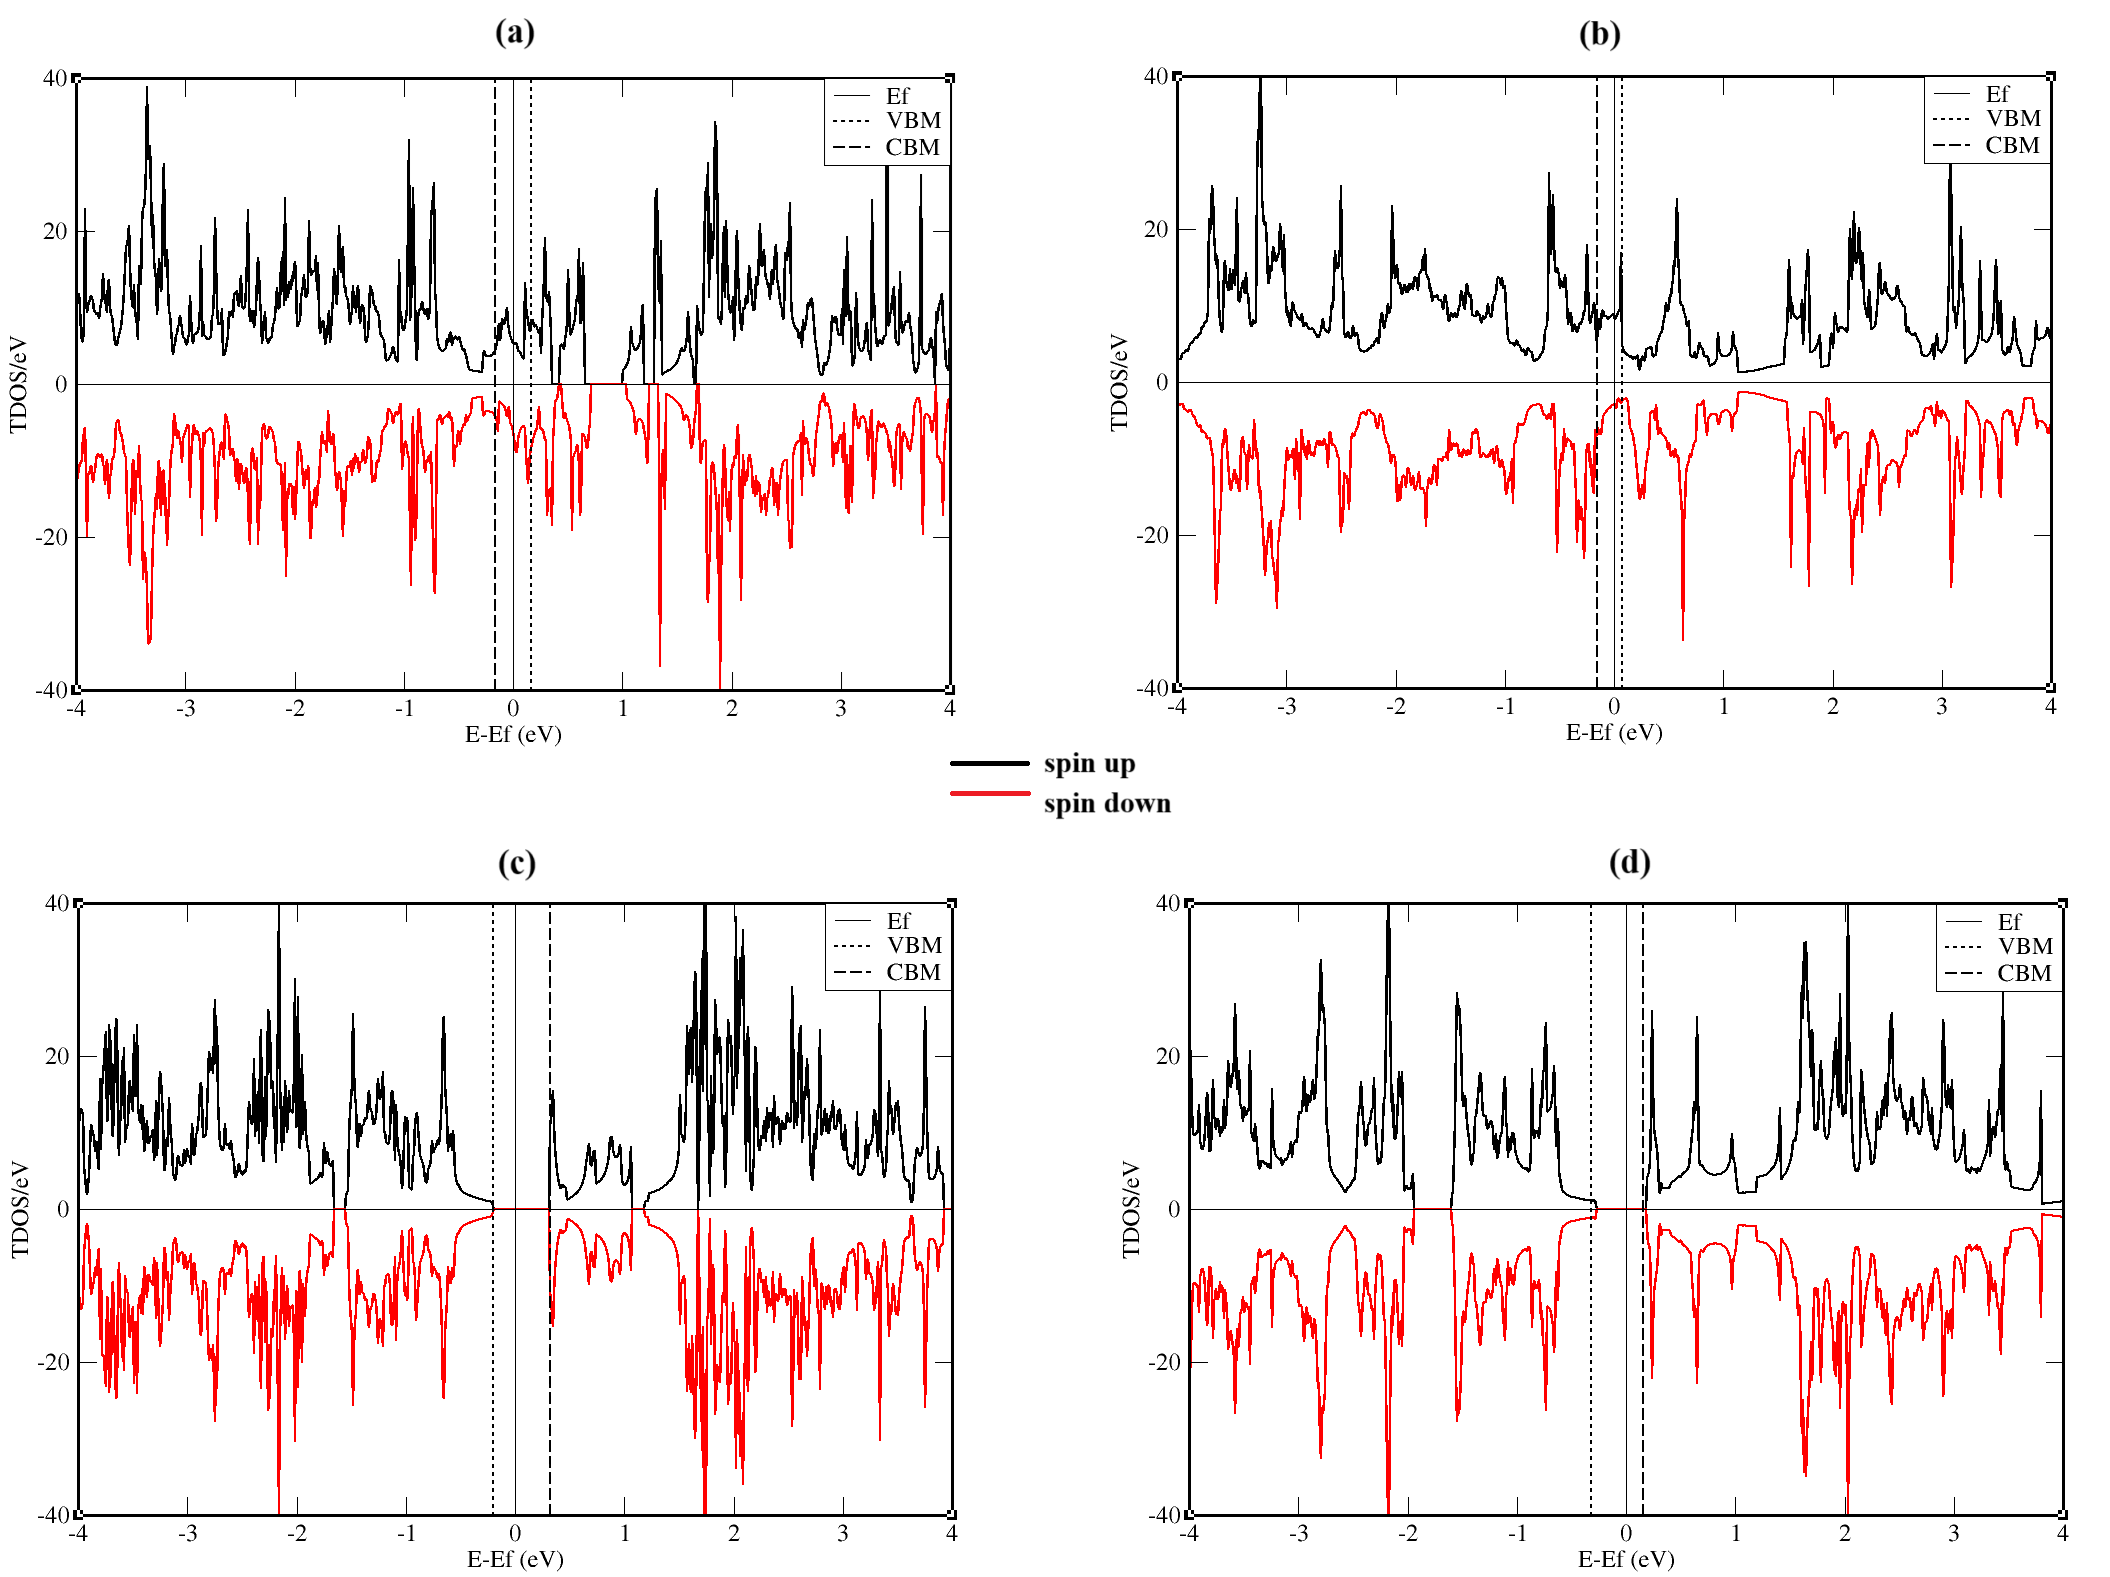


TDOS of Mo and S vacancies: (a) divacancy of Mo (b) three vacancies of Mo (c) divacancy of S (d) three vacancies of S

# **S9**


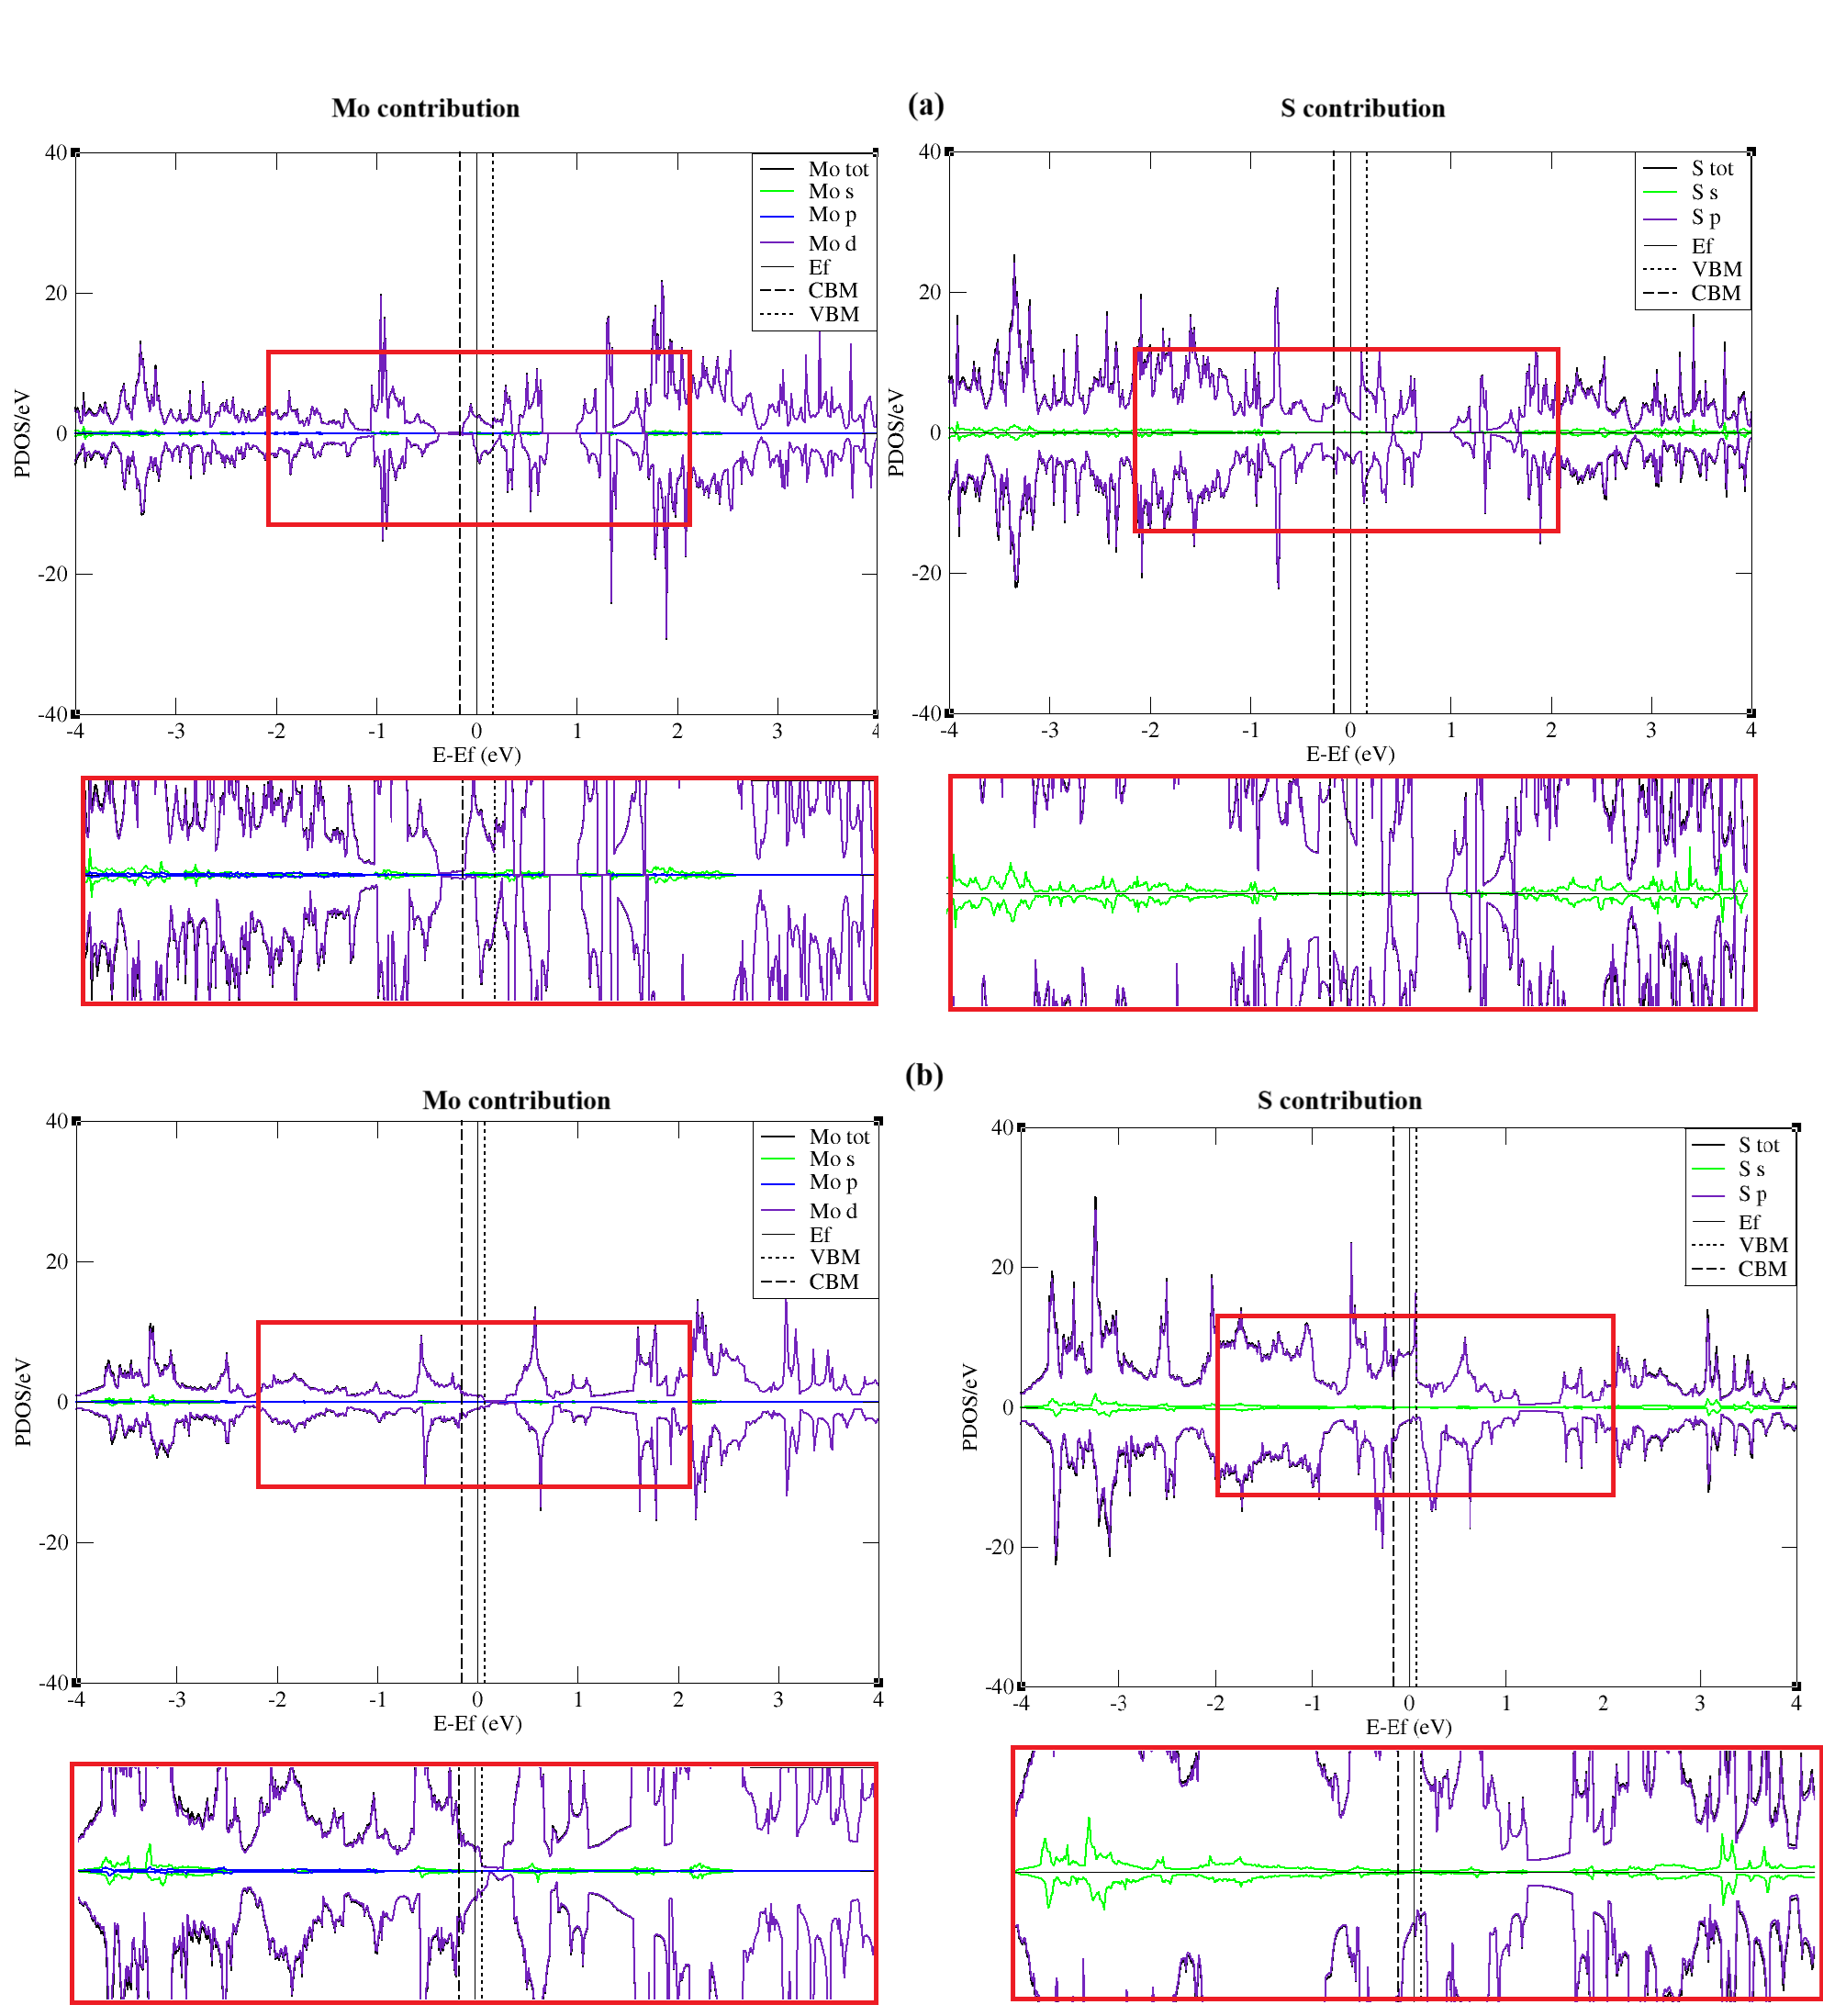


PDOS of Mo vacancies with the contribution from Mo and S atomic orbitals: (a) divacancy (b) three vacancies.
